# Supplementary material for: Theoretical study on structural and mechanical properties of Si-containing ternary transition metal nitrides M0.5Si0.5N (M = Ti, Zr, Hf)
Source: Royal Society of Chemistry journal article supplement (doi:10.1039/d2ra06423e), 2023-01-01

Figure S1. Schematic view of applied tensile and compressive strains in the various crystallographic orientations.

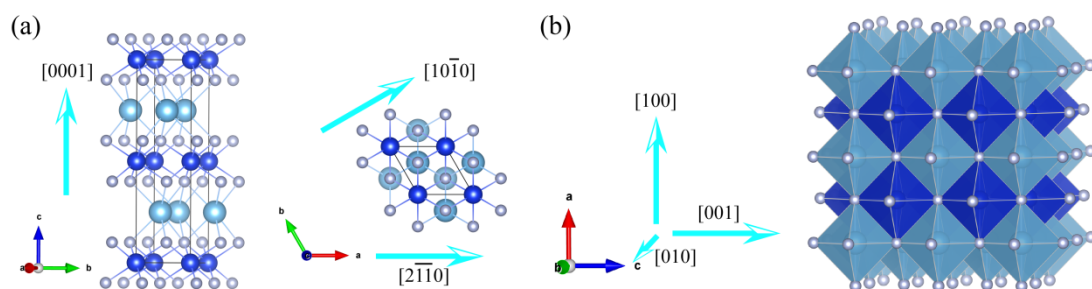

Fig. S2 Tensile/compressive stress-strain curves for ordered B1  $\text{Ti}_{0.5}\text{Si}_{0.5}\text{N}$  (a) and tensile stress-strain curves for disordered SQS-B1  $\text{Ti}_{0.5}\text{Si}_{0.5}\text{N}$ .

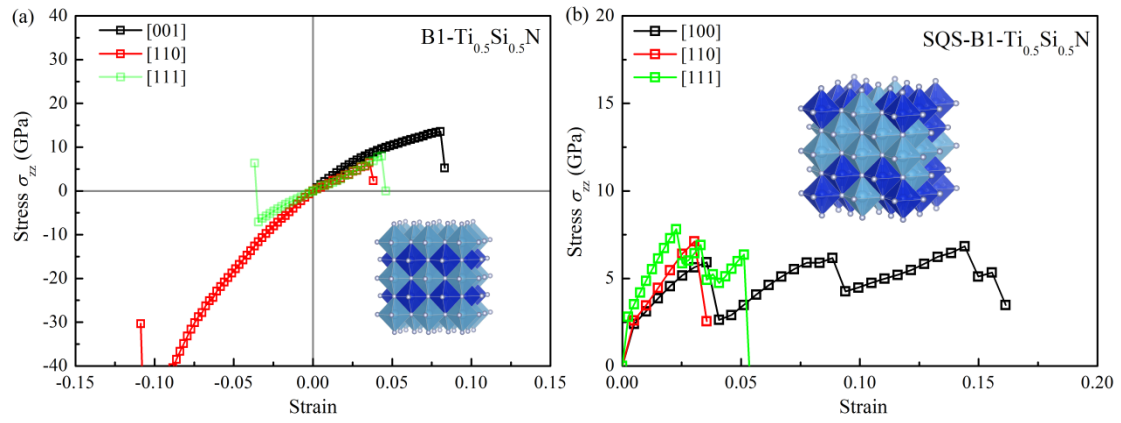

Figure S3. Projected band structures and projected density of states (PDOS) for (a)  $B1\text{-Ti}_{0.5}\text{Si}_{0.5}\text{N}$ , (b)  $P6_3/mmc\text{-TiN}$  and (c)  $P6_3/mmc\text{-SiN}$ .

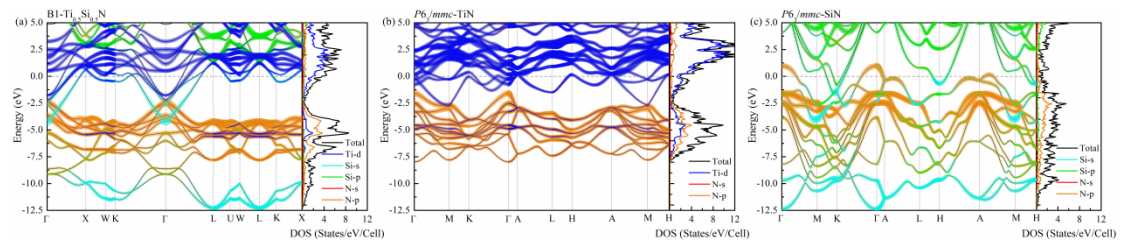

Supplement: d2ra06423e1.pdf [file d2ra06423e1.pdf]
